# Supplementary material for: From zero-dimensional to one-dimensional chain N-oxide bridged compounds with enhanced single-molecule magnetic performance
Source: Royal Society of Chemistry journal article supplement (doi:10.1039/c9dt00210c), 2019-01-01
Supplement: c9dt00210c1.pdf [file c9dt00210c1.pdf]

## Supporting Information

### From Zero-dimensional to One-dimensional Chain N-oxide Bridged Compounds with Enhanced Single-Molecule Magnetic Performance

Ling Zhang,<sup>a</sup> Peng Chen,<sup>a</sup> Hong-Feng Li,<sup>a</sup> Yong-Mei Tian,<sup>\*a</sup> Peng-Fei Yan<sup>a</sup> and Wen-Bin Sun<sup>\*a</sup>

a. Key Laboratory of Functional Inorganic Material Chemistry Ministry of Education, School of Chemistry and Material Science  
Heilongjiang University, 74 Xuefu Road, Harbin 150080, P. R. China.  
E-mail: wenbinsun@126.com

**Table S1.** Crystallographic parameters of all complexes.

|                                             | <b>1Dy</b>                                                                                     | <b>1Y</b>                                                                                     | <b>1Gd</b>                                                                                     | <b>2Dy</b>                                                                                            |
|---------------------------------------------|------------------------------------------------------------------------------------------------|-----------------------------------------------------------------------------------------------|------------------------------------------------------------------------------------------------|-------------------------------------------------------------------------------------------------------|
| formula                                     | C <sub>70</sub> H <sub>46</sub> Dy <sub>2</sub> F <sub>18</sub> N <sub>2</sub> O <sub>14</sub> | C <sub>76</sub> H <sub>60</sub> F <sub>18</sub> N <sub>2</sub> O <sub>14</sub> Y <sub>2</sub> | C <sub>76</sub> H <sub>60</sub> F <sub>18</sub> Gd <sub>2</sub> N <sub>2</sub> O <sub>14</sub> | C <sub>71</sub> H <sub>47</sub> Dy <sub>2</sub> F <sub>18</sub> N <sub>2</sub> O <sub>14</sub> .<br>5 |
| FW (g.mol <sup>-1</sup> )                   | 1806.09                                                                                        | 1745.08                                                                                       | 1881.76                                                                                        | 1827.10                                                                                               |
| Crystal system                              | Monoclinic                                                                                     | Monoclinic                                                                                    | Monoclinic                                                                                     | monoclinic                                                                                            |
| Space group                                 | <i>P2<sub>1</sub>/n</i>                                                                        | <i>C2/c</i>                                                                                   | <i>C2/c</i>                                                                                    | <i>P2<sub>1</sub>/c</i>                                                                               |
| Temperature (K)                             | 293.15                                                                                         | 296.15                                                                                        | 296.15                                                                                         | 293                                                                                                   |
| a (Å)                                       | 14.9410(6)                                                                                     | 30.584(4)                                                                                     | 30.888(3)                                                                                      | 24.291(2)                                                                                             |
| b (Å)                                       | 14.3461(12)                                                                                    | 11.6402(14)                                                                                   | 11.6448(10)                                                                                    | 14.5614(16)                                                                                           |
| c (Å)                                       | 17.1220(8)                                                                                     | 23.067(3)                                                                                     | 23.2385(19)                                                                                    | 23.223(2)                                                                                             |
| α (°)                                       | 90                                                                                             | 90                                                                                            | 90                                                                                             | 90                                                                                                    |
| β (°)                                       | 101.175(4)                                                                                     | 108.878(2)                                                                                    | 109.5270(10)                                                                                   | 117.676(12)                                                                                           |
| γ (°)                                       | 90                                                                                             | 90                                                                                            | 90                                                                                             | 90                                                                                                    |
| V (Å <sup>3</sup> )                         | 3600.4(4)                                                                                      | 7770.3(16)                                                                                    | 7877.9(11)                                                                                     | 7274.4(14)                                                                                            |
| ρ <sub>calc</sub> (g.cm <sup>-3</sup> )     | 1.666                                                                                          | 1.492                                                                                         | 1.587                                                                                          | 1.668                                                                                                 |
| μ (mm <sup>-1</sup> )                       | 2.169                                                                                          | 1.592                                                                                         | 1.774                                                                                          | 2.149                                                                                                 |
| F (000)                                     | 1772.0                                                                                         | 3528.0                                                                                        | 3728.0                                                                                         | 3588.0                                                                                                |
| Collected reflections                       | 33723                                                                                          | 25297                                                                                         | 34589                                                                                          | 22451                                                                                                 |
| Independent reflections                     | 9389                                                                                           | 6860                                                                                          | 9764                                                                                           | 13211                                                                                                 |
| R <sub>int</sub>                            | 0.0277                                                                                         | 0.0340                                                                                        | 0.0215                                                                                         | 0.0606                                                                                                |
| R <sub>1</sub> [ <i>I</i> > 2σ( <i>I</i> )] | 0.0425                                                                                         | 0.0409                                                                                        | 0.0334                                                                                         | 0.1047                                                                                                |
| wR <sub>2</sub> (all data)                  | 0.0892                                                                                         | 0.1029                                                                                        | 0.1163                                                                                         | 0.2867                                                                                                |
| GOF                                         | 1.118                                                                                          | 1.041                                                                                         | 0.739                                                                                          | 1.055                                                                                                 |

**Table S2.** Selected bond lengths (Å) and angles (°) for **1Dy**

|                  |            |                  |            |
|------------------|------------|------------------|------------|
| Dy1-O1           | 2.350(3)   | Dy1-O4           | 2.337(3)   |
| Dy1-O2           | 2.310(3)   | Dy1-O3           | 2.307(3)   |
| Dy1-O6           | 2.343(3)   | Dy1-O5           | 2.317(3)   |
| Dy1-O7           | 2.388(3)   | Dy1-O7'          | 2.415(2)   |
| O(1)-Dy(1)-O(2)  | 71.82(10)  | O(1)-Dy(1)-O(6)  | 144.14(11) |
| O(1)-Dy(1)-O(7') | 124.87(10) | O(1)-Dy(1)-O(7)  | 78.33(9)   |
| O(4)-Dy(1)-O(1)  | 132.94(11) | O(4)-Dy(1)-O(2)  | 77.80(13)  |
| O(4)-Dy(1)-O(6)  | 74.87(13)  | O(4)-Dy(1)-O(7') | 78.60(9)   |

|                  |            |                  |            |
|------------------|------------|------------------|------------|
| O(4)-Dy(1)-O(7)  | 141.04(9)  | O(2)-Dy(1)-O(6)  | 143.82(11) |
| O(2)-Dy(1)-O(7)  | 96.30(11)  | O(2)-Dy(1)-O(7') | 75.19(10)  |
| O(3)-Dy(1)-O(1)  | 73.84(11)  | O(3)-Dy(1)-O(4)  | 75.84(12)  |
| O(3)-Dy(1)-O(2)  | 91.44(13)  | O(3)-Dy(1)-O(6)  | 101.97(13) |
| O(3)-Dy(1)-O(5)  | 75.84(12)  | O(3)-Dy(1)-O(7)  | 147.09(9)  |
| O(3)-Dy(1)-O(7') | 149.61(10) | O(6)-Dy(1)-O(7)  | 90.38(11)  |
| O(6)-Dy(1)-O(7') | 90.38(11)  | O(5)-Dy(1)-O(1)  | 73.55(10)  |
| O(5)-Dy(1)-O(4)  | 126.00(12) | O(5)-Dy(1)-O(2)  | 145.21(10) |
| O(5)-Dy(1)-O(6)  | 70.96(11)  | O(5)-Dy(1)-O(7)  | 79.75(10)  |
| O(5)-Dy(1)-O(7') | 129.58(10) | O(7')-Dy(1)-O(7) | 62.80(10)  |

Table S3. Selected bond lengths (Å) and angles (°) for **2Dy**

|             |           |              |           |
|-------------|-----------|--------------|-----------|
| Dy1-O4      | 2.305(9)  | Dy2-O14'     | 2.427(9)  |
| Dy1-O7'     | 2.394(9)  | Dy2-O14      | 2.390(9)  |
| Dy1-O7      | 2.425(9)  | Dy2-O12      | 2.356(10) |
| Dy1-O5      | 2.334(10) | Dy2-O11      | 2.319(11) |
| Dy1-O3      | 2.301(12) | Dy2-O13      | 2.366(11) |
| Dy1-O1      | 2.317(11) | Dy2-O9       | 2.315(10) |
| Dy1-O2      | 2.311(10) | Dy2-O10      | 2.289(13) |
| Dy1-O6      | 2.360(12) | Dy2-O8       | 2.341(13) |
| Dy1'-O7-Dy1 | 116.5(3)  | Dy2-O14-Dy2' | 117.0(3)  |
| O4-Dy1-O7   | 75.0(3)   | O14'-Dy2-O14 | 63.0(3)   |
| O4-Dy1-O7'  | 117.1(3)  | O12-Dy2-O14' | 79.3(3)   |
| O4-Dy1-O5   | 76.4(4)   | O12-Dy2-O14  | 127.3(3)  |
| O4-Dy1-O1   | 140.2(4)  | O12-Dy2-O13  | 70.6(3)   |
| O4-Dy1-O2   | 74.1(3)   | O11-Dy2-O14' | 141.5(3)  |
| O4-Dy1-O6   | 143.4(4)  | O11-Dy2-O14  | 78.5(3)   |
| O7'-Dy1-O7  | 63.5(3)   | O11-Dy2-O12  | 128.0(4)  |
| O5-Dy1-O7'  | 82.2(3)   | O11-Dy2-O13  | 77.3(4)   |
| O5-Dy1-O6   | 135.5(3)  | O11-Dy2-O8   | 75.6(4)   |
| O3-Dy1-O4   | 72.4(4)   | O13-Dy2-O14  | 74.4(4)   |
| O3-Dy1-O7   | 72.4(4)   | O13-Dy2-O14' | 90.8(4)   |
| O3-Dy1-O7'  | 74.6(4)   | O9-Dy2-O14'  | 76.7(4)   |
| O3-Dy1-O5   | 145.2(4)  | O9-Dy2-O14   | 124.1(4)  |
| O3-Dy1-O1   | 79.1(4)   | O9-Dy2-O12   | 75.9(4)   |
| O3-Dy1-O2   | 78.7(4)   | O9-Dy2-O11   | 131.0(4)  |
| O3-Dy1-O6   | 141.7(4)  | O9-Dy2-O13   | 145.9(4)  |
| O1-Dy1-O7   | 140.6(3)  | O9-Dy2-O8    | 70.5(4)   |
| O1-Dy1-O7'  | 80.6(3)   | O10-Dy2-O14' | 146.5(3)  |
| O1-Dy1-O5   | 117.2(4)  | O10-Dy2-O14  | 150.4(3)  |
| O1-Dy1-O6   | 117.2(4)  | O10-Dy2-O12  | 74.9(4)   |
| O2-Dy1-O7'  | 145.6(3)  | O10-Dy2-O11  | 72.0(4)   |
| O2-Dy1-O7   | 146.2(3)  | O10-Dy2-O13  | 100.3(5)  |
| O2-Dy1-O5   | 77.6(4)   | O10-Dy2-O8   | 94.6(5)   |
| O2-Dy1-O1   | 73.2(3)   | O8-Dy2-O14'  | 76.0(4)   |
| O2-Dy1-O6   | 73.2(3)   | O8-Dy2-O14   | 95.1(4)   |
| O6-Dy1-O7'  | 75.4(4)   | O8-Dy2-O12   | 146.4(4)  |
| O6-Dy1-O7   | 82.3(4)   | O8-Dy2-O13   | 143.0(4)  |

Table S4. Continuous Shape Measures (CShMs) of the coordination geometry for Dy(III) ion in complexes **1Dy** and **2Dy** ( $S$  values calculated with the Shape program). The  $S$  values indicated the proximity to the ideal polyhedron, thus, a  $S = 0$  corresponds to the non-distorted polyhedron. The three closer ideal geometry to the real complexes are listed and below is the symmetry and description for each polyhedron.

|        | <b>1Dy</b> ( $D_{Y1}$ ) | <b>2Dy</b> ( $D_{Y1}$ ) | <b>2Dy</b> ( $D_{Y2}$ ) |
|--------|-------------------------|-------------------------|-------------------------|
| TDD-8  | 0.431                   | 1.962                   | 0.304                   |
| SAPR-8 | 2.027                   | 0.539                   | 2.404                   |
| BTPR-8 | 2.108                   | 1.671                   | 2.406                   |

|        |     |                            |
|--------|-----|----------------------------|
| TDD-8  | D2d | Triangular dodecahedron    |
| SAPR-8 | D4d | Square antiprism           |
| BTPR-8 | C2v | Biaugmented trigonal prism |

Table S5. Energy barriers obtained from the Arrhenius law fitting and Equation 2 of the out-of-phase ( $\chi''$ ) ac susceptibility data under zero dc field.

| Relaxation processes | Orbach processes              |                       | Raman and Orbach processes                |      |                               |                       |
|----------------------|-------------------------------|-----------------------|-------------------------------------------|------|-------------------------------|-----------------------|
|                      | $U_{\text{eff}}/\kappa_B$ (K) | $\tau_0$ (s)          | C ( $\text{s}^{-1} \cdot \text{K}^{-n}$ ) | n    | $U_{\text{eff}}/\kappa_B$ (K) | $\tau_0$ (s)          |
| <b>1Dy</b>           | 72.04                         | $1.78 \times 10^{-6}$ | $3.65 \times 10^{-3}$                     | 5.08 | 88.51                         | $2.32 \times 10^{-6}$ |
| <b>2Dy</b>           | 86.98                         | $1.02 \times 10^{-6}$ | $4.80 \times 10^{-3}$                     | 4.72 | 108.98                        | $5.49 \times 10^{-7}$ |
| <b>1a</b>            | 50.13                         | $1.42 \times 10^{-5}$ | $3.01 \times 10^{-2}$                     | 3.88 | 61.17                         | $1.12 \times 10^{-5}$ |
| <b>2a</b>            | 50.66                         | $9.26 \times 10^{-6}$ | 5.56                                      | 1.22 | 46.14                         | $1.51 \times 10^{-5}$ |

Table S6. Energy barriers obtained from the Arrhenius law fitting and Equation 1 of the out-of-phase ( $\chi''$ ) ac susceptibility data under applied dc field.

| Relaxation process | Orbach processes              |                       | Raman and Orbach processes                |      |                               |                       |
|--------------------|-------------------------------|-----------------------|-------------------------------------------|------|-------------------------------|-----------------------|
|                    | $U_{\text{eff}}/\kappa_B$ (K) | $\tau_0$ (s)          | C ( $\text{s}^{-1} \cdot \text{K}^{-n}$ ) | n    | $U_{\text{eff}}/\kappa_B$ (K) | $\tau_0$ (s)          |
| <b>1Dy</b>         | 71.04                         | $1.63 \times 10^{-6}$ | $7.75 \times 10^{-3}$                     | 4.82 | 85.35                         | $1.77 \times 10^{-6}$ |
| <b>2Dy</b>         | 83.25                         | $1.12 \times 10^{-6}$ | $1.64 \times 10^{-2}$                     | 4.17 | 97.89                         | $7.32 \times 10^{-7}$ |
| <b>1a</b>          | 59.04                         | $9.35 \times 10^{-6}$ | $3.96 \times 10^{-2}$                     | 3.07 | 63.54                         | $7.42 \times 10^{-6}$ |
| <b>2a</b>          | 59.32                         | $5.84 \times 10^{-6}$ | $1.05 \times 10^{-2}$                     | 4.24 | 58.64                         | $8.98 \times 10^{-6}$ |

Table S7. Best fitted parameters ( $\chi_T$ ,  $\chi_S$ ,  $\tau$  and  $\alpha$ ) with the extended Debye model for complex **1Dy** at 0 Oe in the temperature range 5-16K.

| T/ K | $\chi_S / \text{cm}^3 \text{mol}^{-1}$ | $\chi_T / \text{cm}^3 \text{mol}^{-1}$ | $\tau/\text{s}$ | $\alpha$ | R |
|------|----------------------------------------|----------------------------------------|-----------------|----------|---|
|------|----------------------------------------|----------------------------------------|-----------------|----------|---|

|    |         |         |         |         |           |
|----|---------|---------|---------|---------|-----------|
| 5  | 0.03799 | 3.97469 | 0.07774 | 0.03399 | 3.30E-005 |
| 6  | 0.03990 | 3.39124 | 0.03057 | 0.02648 | 2.75E-005 |
| 7  | 0.03983 | 2.96212 | 0.01377 | 0.01832 | 2.10E-005 |
| 8  | 0.04186 | 2.62889 | 0.00677 | 0.00850 | 2.90E-005 |
| 9  | 0.04100 | 2.37161 | 0.00360 | 0.01085 | 2.21E-005 |
| 10 | 0.04089 | 2.15932 | 0.00203 | 0.00914 | 2.46E-005 |
| 11 | 0.05360 | 1.97515 | 0.00120 | 0.00156 | 2.94E-005 |
| 12 | 0.06098 | 1.82716 | 0.00074 | 0.00005 | 2.67E-005 |
| 13 | 0.07467 | 1.70061 | 0.00048 | 0.00184 | 3.45E-005 |
| 14 | 0.08590 | 1.58982 | 0.00032 | 0.00114 | 3.88E-005 |
| 15 | 0.13334 | 1.49357 | 0.00021 | 0.00154 | 4.60E-005 |
| 16 | 0.18104 | 1.40459 | 0.00015 | 0.00425 | 4.38E-005 |

Table S8. Best fitted parameters ( $\chi_T$ ,  $\chi_S$ ,  $\tau$  and  $\alpha$ ) with the extended Debye model for complex **2Dy** at 0 Oe in the temperature range 5-18K.

| T/ K | $\chi_S / \text{cm}^3 \text{mol}^{-1}$ | $\chi_T / \text{cm}^3 \text{mol}^{-1}$ | $\tau/\text{s}$ | $\alpha$ | R         |
|------|----------------------------------------|----------------------------------------|-----------------|----------|-----------|
| 5    | 0.06812                                | 3.22264                                | 0.09998         | 0.14598  | 9.50E-004 |
| 6    | 0.04537                                | 3.05754                                | 0.05008         | 0.17733  | 6.01E-004 |
| 7    | 0.03078                                | 2.75650                                | 0.02427         | 0.18701  | 4.77E-004 |
| 8    | 0.02270                                | 2.48125                                | 0.01257         | 0.18708  | 3.62E-004 |
| 9    | 0.02394                                | 2.23671                                | 0.00674         | 0.18624  | 2.66E-004 |
| 10   | 0.02247                                | 2.04896                                | 0.00388         | 0.18935  | 2.22E-004 |
| 11   | 0.02948                                | 1.88215                                | 0.00229         | 0.19435  | 2.31E-004 |
| 12   | 0.03108                                | 1.73775                                | 0.00139         | 0.20390  | 2.42E-004 |
| 13   | 0.06579                                | 1.61384                                | 0.00089         | 0.20269  | 2.43E-004 |
| 14   | 0.17210                                | 1.50567                                | 0.00062         | 0.19182  | 2.57E-004 |
| 15   | 0.21593                                | 1.41041                                | 0.00040         | 0.20343  | 1.62E-004 |
| 16   | 0.35709                                | 1.32451                                | 0.00031         | 0.17034  | 8.54E-005 |
| 17   | 0.56290                                | 1.24814                                | 0.00027         | 0.07884  | 3.55E-005 |
| 18   | 0.53956                                | 1.18609                                | 0.00016         | 0.11352  | 7.19E-005 |

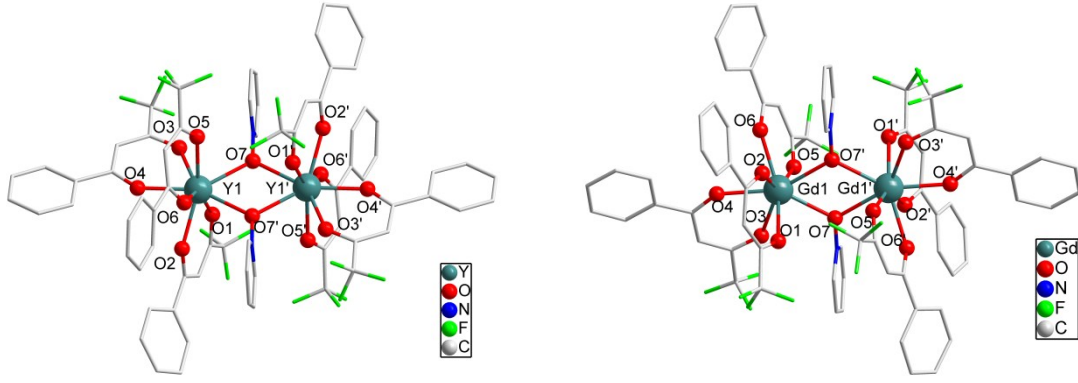

Fig. S1. Molecular structure of complexes **1Y** (left) and **1Gd** (right). Colour code: Y and Gd (teal), O (red), N (blue), F (green), C (grey). H atoms and disorder atoms were omitted for clarity.

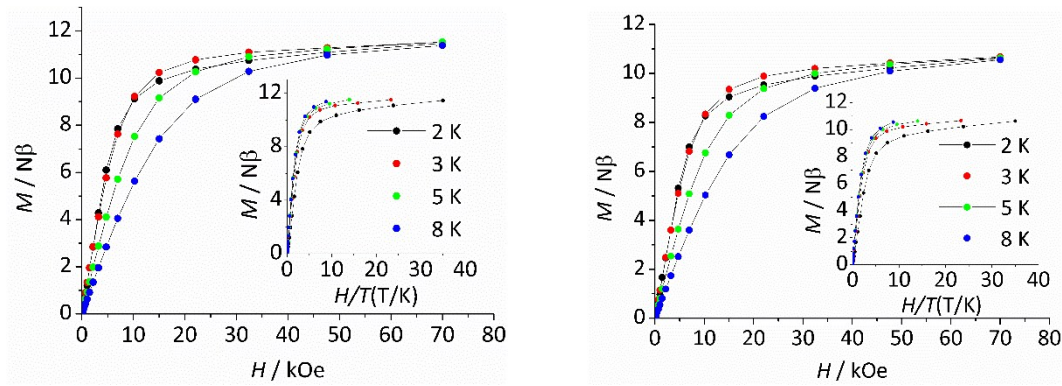

Figure S2. Field dependences of magnetization in the field range 0–70 kOe and temperature range 2–8 K for complex **1Dy** (left) and **2Dy** (right). Inset:  $M$  vs.  $H/T$  plots at different temperatures 2, 3, 5 and 8 K.

The  $\chi_m T$  values of the **1Gd** and **2Gd** are 14.91 and 14.78  $\text{cm}^3 \text{K mol}^{-1}$  at 300 K, respectively, somewhat smaller than the expected value 15.76  $\text{cm}^3 \text{K mol}^{-1}$  of two uncoupled  $^8S_{7/2}$  centers.

With the known isotropic interaction, the Hamiltonian  $H = -JS_{\text{Gd1}} \cdot S_{\text{Gd2}}$  results in the formula for the temperature dependence of the molar magnetic susceptibility in equation (S1), where  $g$  is the Landé factor,  $\beta$  is the Bohr magneton,  $N$  is the Avogadro number, and  $k$  is the Boltzmann constant and  $x = -J/kT$ .

$$\begin{aligned}
 \chi_m T &= \frac{2Ng^2\mu_B^2}{k} \frac{e^x + 5e^{3x} + 14e^{6x} + 30e^{10x} + 55e^{15x} + 91e^{21x}}{1 + 3e^x + 5e^{3x} + 7e^{6x} + 9e^{10x} + 11e^{15x} + 13e^{21x}} \\
 \text{(S1)}
 \end{aligned}$$

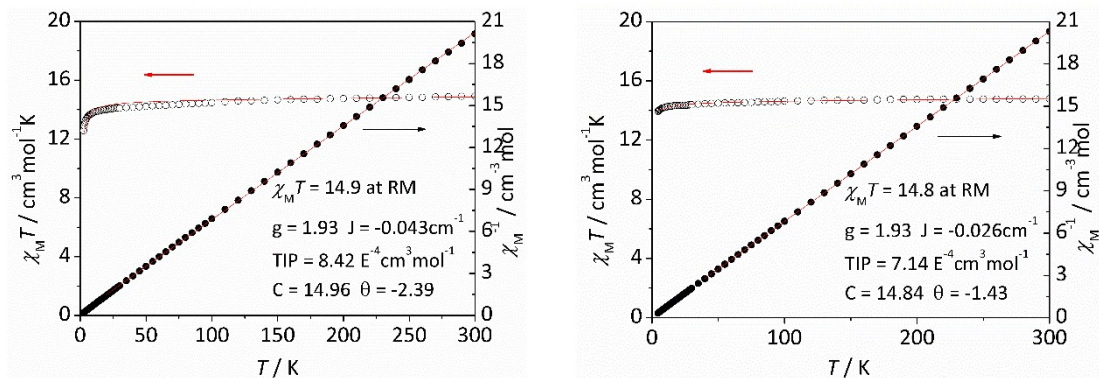

Fig. S3. Temperature dependence of the  $\chi_M T$  values T measured at 1000 Oe for **1Gd** (left) and **2Gd** (right). The solid line corresponds to the best fit for **1Gd** and **2Gd**.

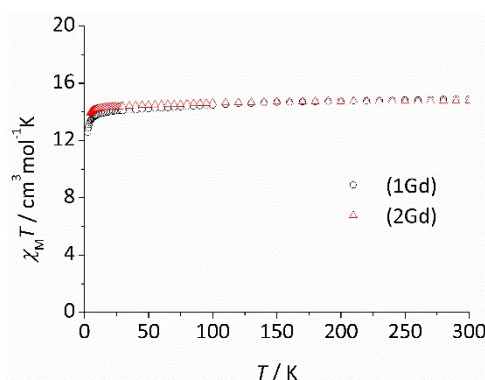

Fig. S4. Temperature dependence of the  $\chi_M T$  values T measured at 1000 Oe for **1Gd** and **2Gd**.

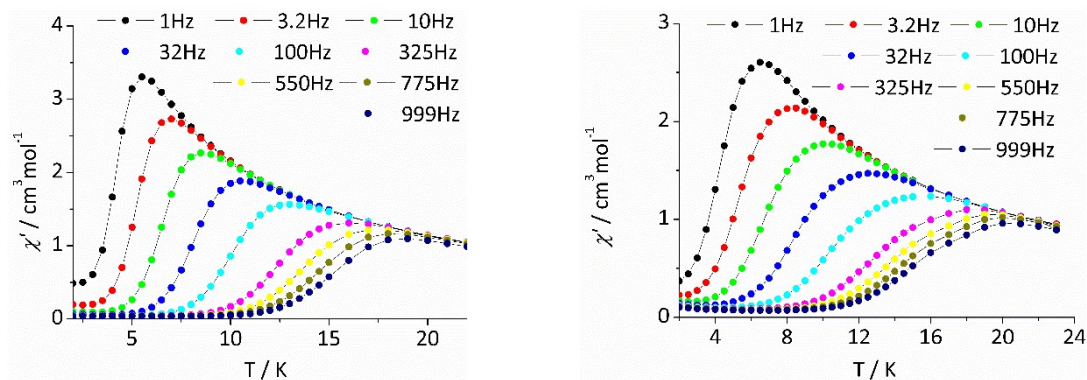

Fig. S5. Temperature dependence of the in-phase ( $\chi'$ ) for complexes **1Dy** (left) and **2Dy** (right) without dc field.

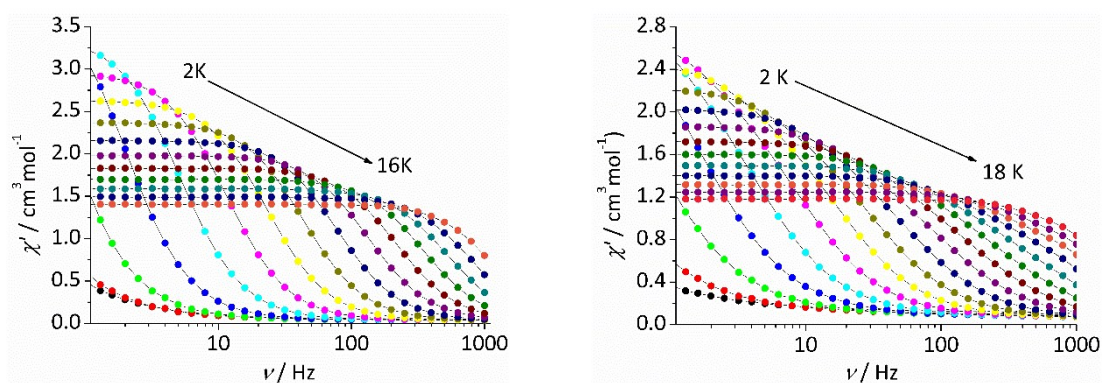

Fig. S6. Frequency dependence of the in-phase ( $\chi'$ ) for complexes **1Dy** (left) and **2Dy** (right) without dc field.

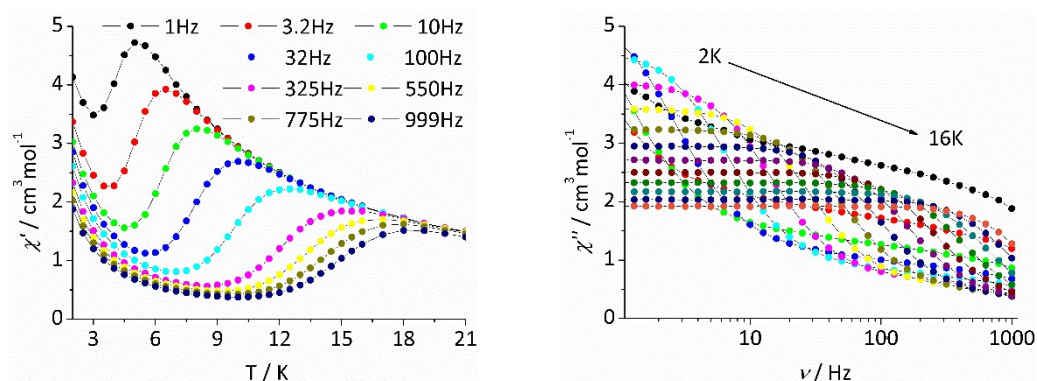

Fig. S7. The temperature (left) and frequency (right) dependence of out-of-phase ( $\chi''$ ) ac susceptibility for **1Dy** under 1500 Oe dc field.

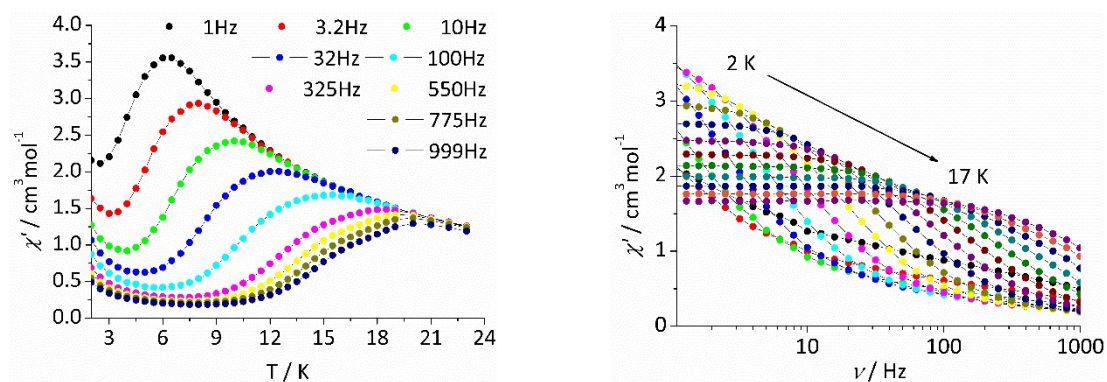

Fig. S8. The temperature (left) and frequency (right) dependence of out-of-phase ( $\chi''$ ) ac susceptibility for **2Dy** under 1900 Oe dc field.

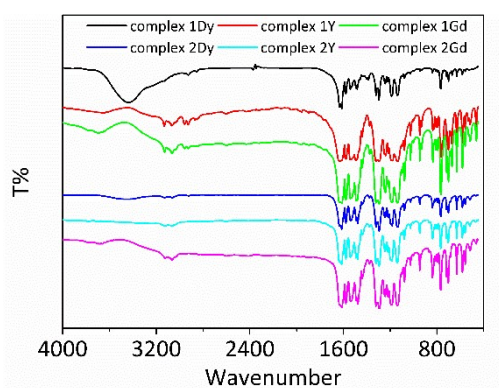

Fig. S9. FT-IR spectra of all the complexes.



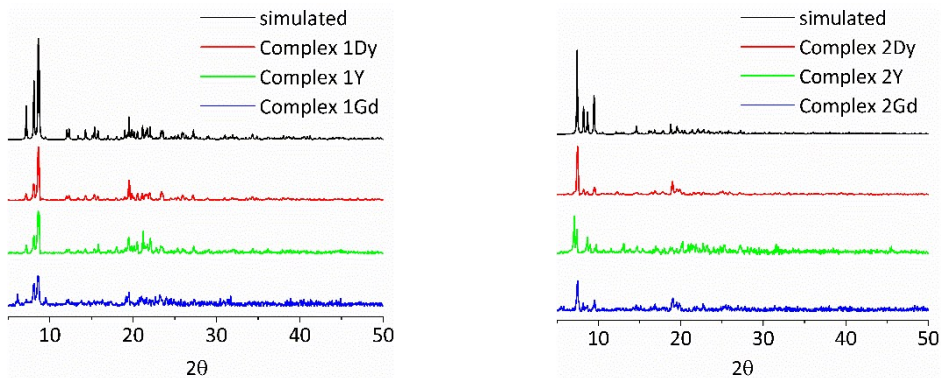

Fig. S10. PXRD analysis of all the complexes.

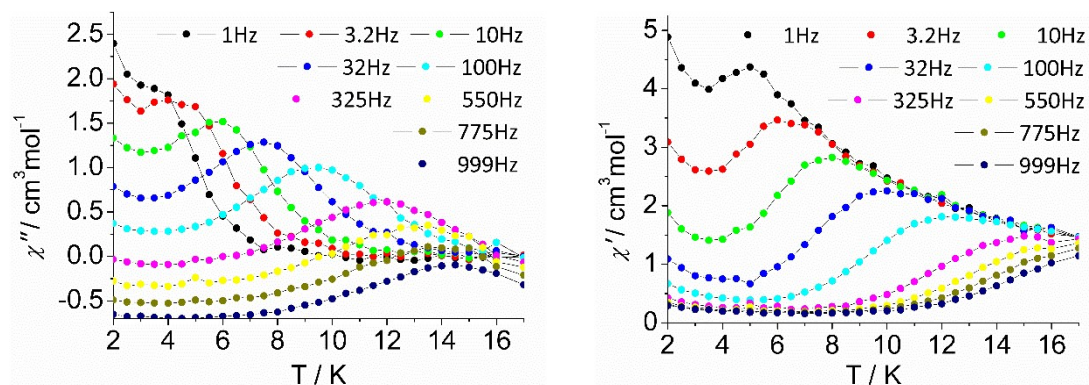

Fig. S11. Temperature dependence of the out-of-phase ( $\chi''$ ) and in-phase ( $\chi'$ ) for **1a** without dc field.

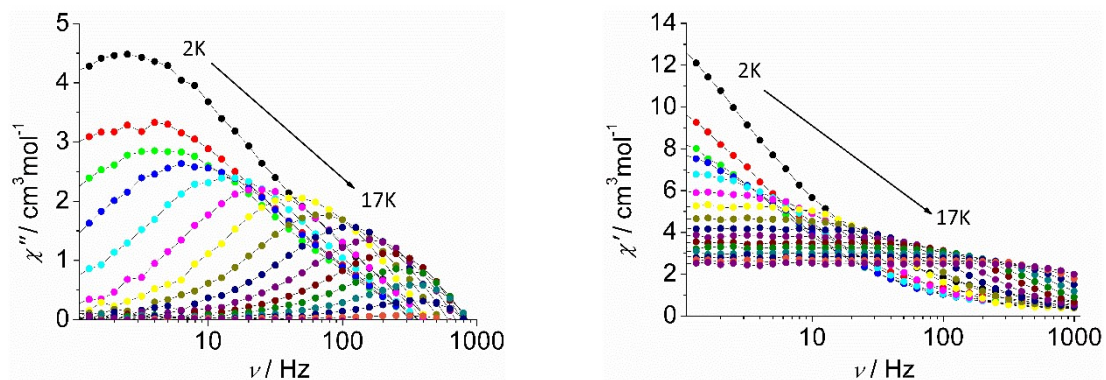

Fig. S12. Frequency dependence of the out-of-phase ( $\chi''$ ) and in-phase ( $\chi'$ ) for **1a** without dc field.

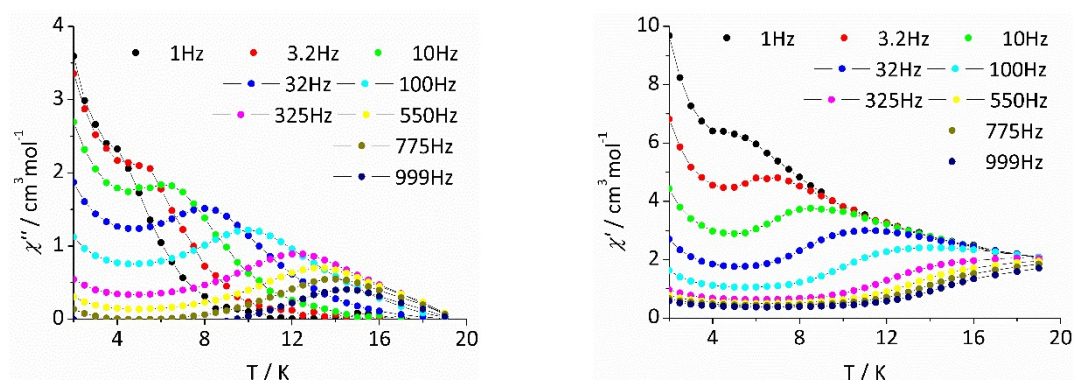

Fig. S13. Temperature dependence of the out-of-phase ( $\chi''$ ) and in-phase ( $\chi'$ ) for **2a** without dc field.

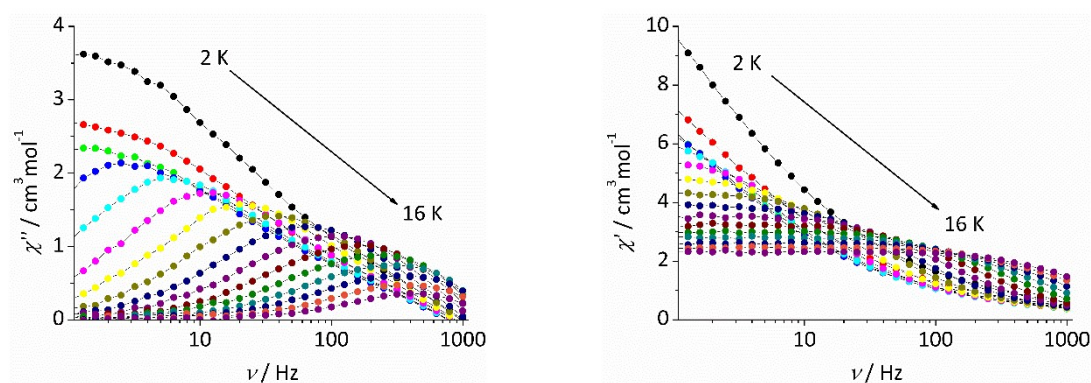

Fig. S14. Frequency dependence of the out-of-phase ( $\chi''$ ) and in-phase ( $\chi'$ ) for **2a** without dc field.

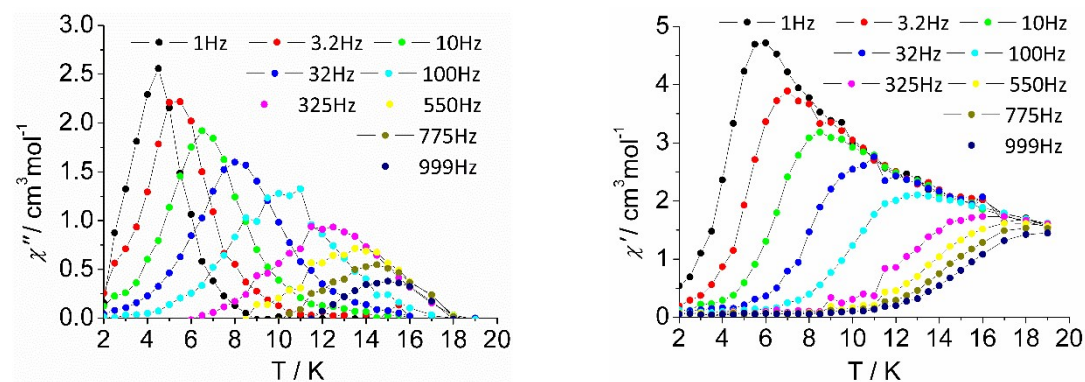

Fig. S15. Temperature dependence of the out-of-phase ( $\chi''$ ) and in-phase ( $\chi'$ ) for **1a** under 1500 Oe dc field.

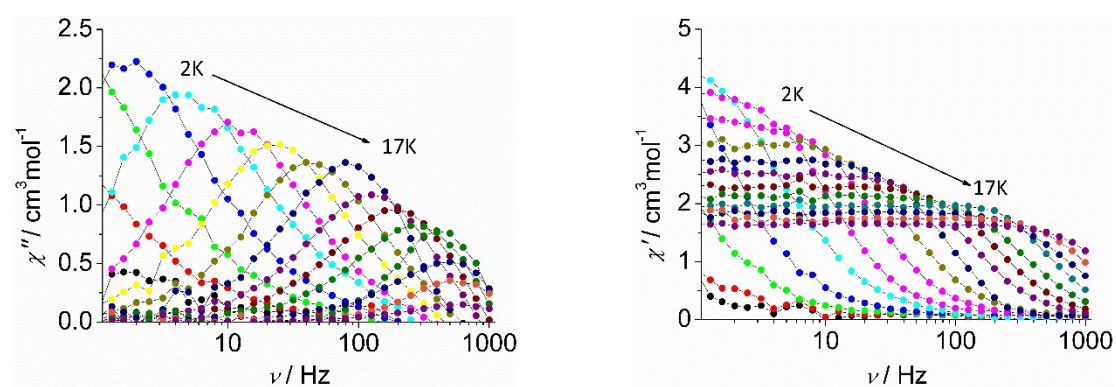

Fig. S16. Frequency dependence of the out-of-phase ( $\chi''$ ) and in-phase ( $\chi'$ ) for **1a** under 1500 Oe dc field.

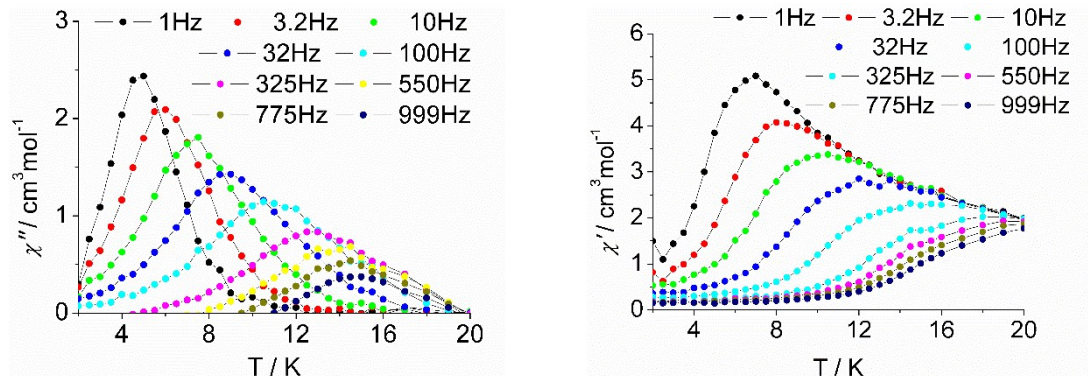

Fig. S17. Temperature dependence of the out-of-phase ( $\chi''$ ) and in-phase ( $\chi'$ ) for **2a** under 1500 Oe dc field.

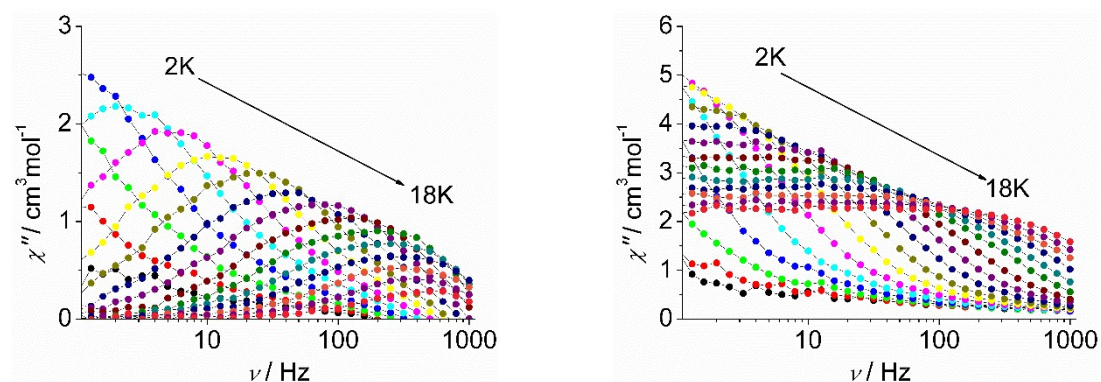

Fig. S18. Frequency dependence of the out-of-phase ( $\chi''$ ) and in-phase ( $\chi'$ ) for **2a** under 1500 Oe dc field.

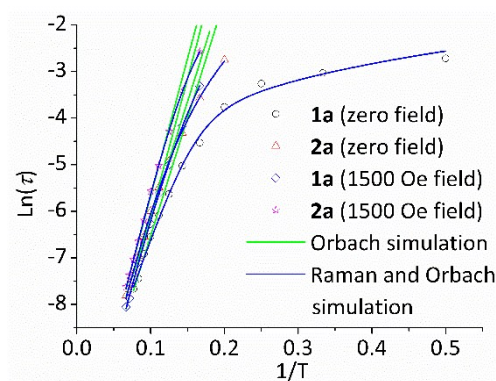

Fig. S19. Plot of  $\ln(\tau)$  vs  $1/T$  for **1a** and **2a**. The green lines represent pure Arrhenius fitting at the high-temperature linear region under zero field and dc field. Blue lines correspond to the fitted results combining Orbach and Raman relaxation processes.

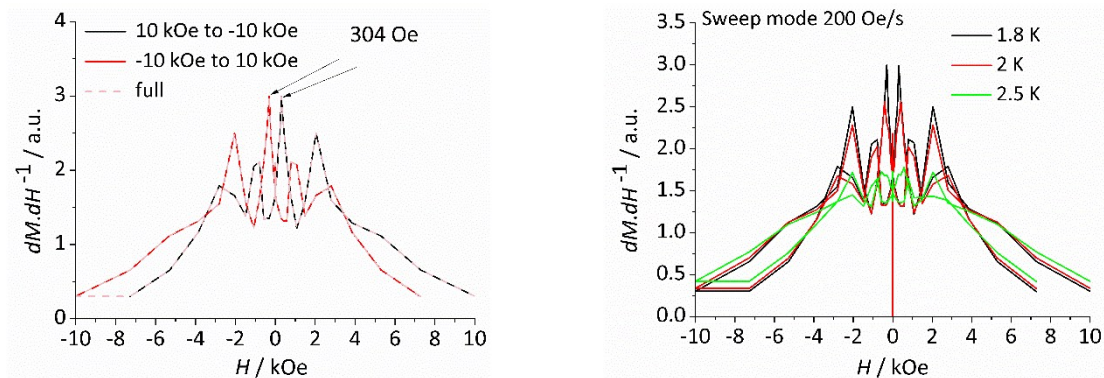

Fig. S20. The first derivative of magnetization ( $dM/dH$ ) of complex **1Dy** versus magnetic field for the curves measured at 1.8 K (left) and different temperature (right) at scan rate of 200 Oe/s, sweep mode.

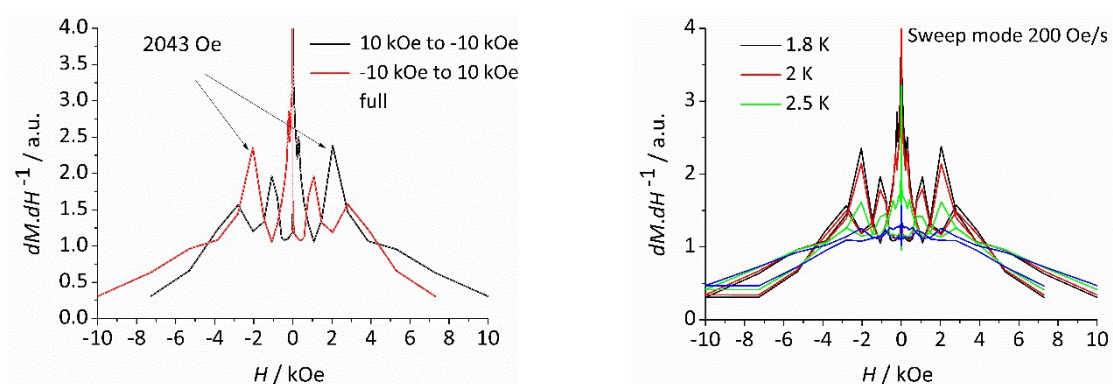

Fig. S21. The first derivative of magnetization ( $dM/dH$ ) of complex **2Dy** versus magnetic field for the curves measured at 1.8 K (left) and different temperature (right) at scan rate of 200 Oe/s, sweep mode.
